# Supplementary material for: Outcomes in relapsed/refractory diffuse large B-cell lymphoma in an Asian tertiary cancer center: contemporary interventions as a benchmark for novel therapy
Source: Research Square preprint supplement (doi:10.21203/rs.3.rs-7108890/v1), 2025-07-15
Supplement: Supplementary file 1 [file 47f641463c33f51375446e2b.docx]

**
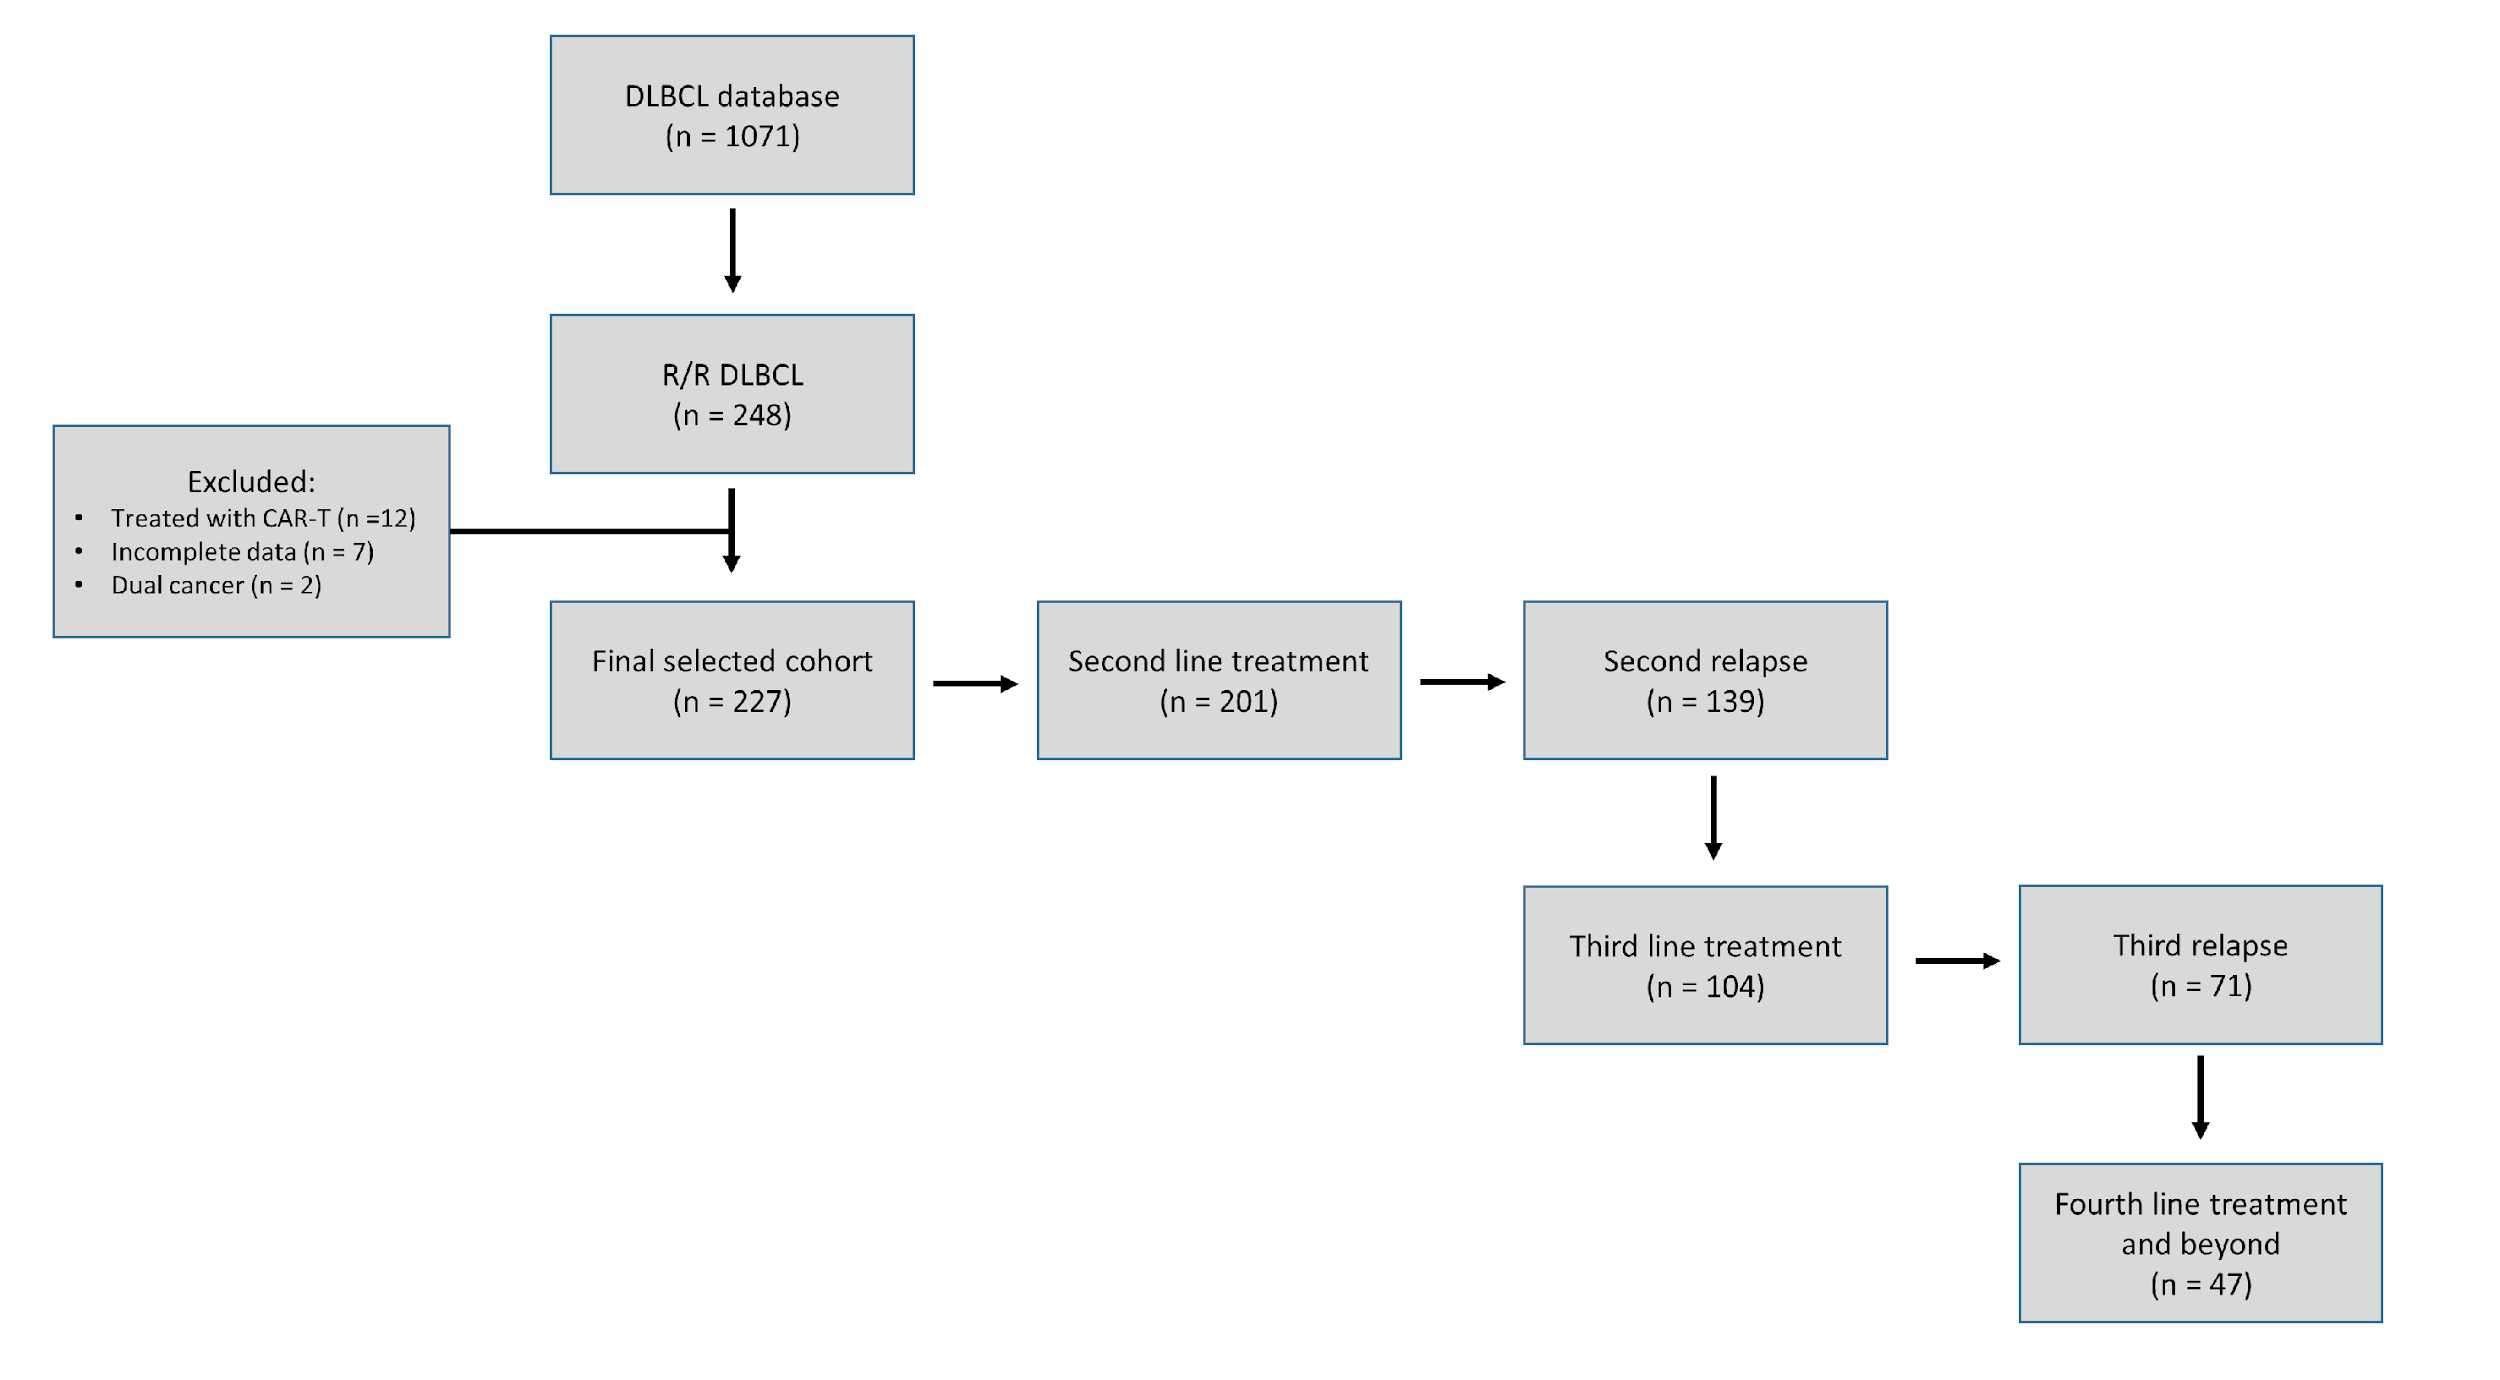
**

**Supplementary Figure 1. Patient inclusion and treatment overview in the study cohort.**

**
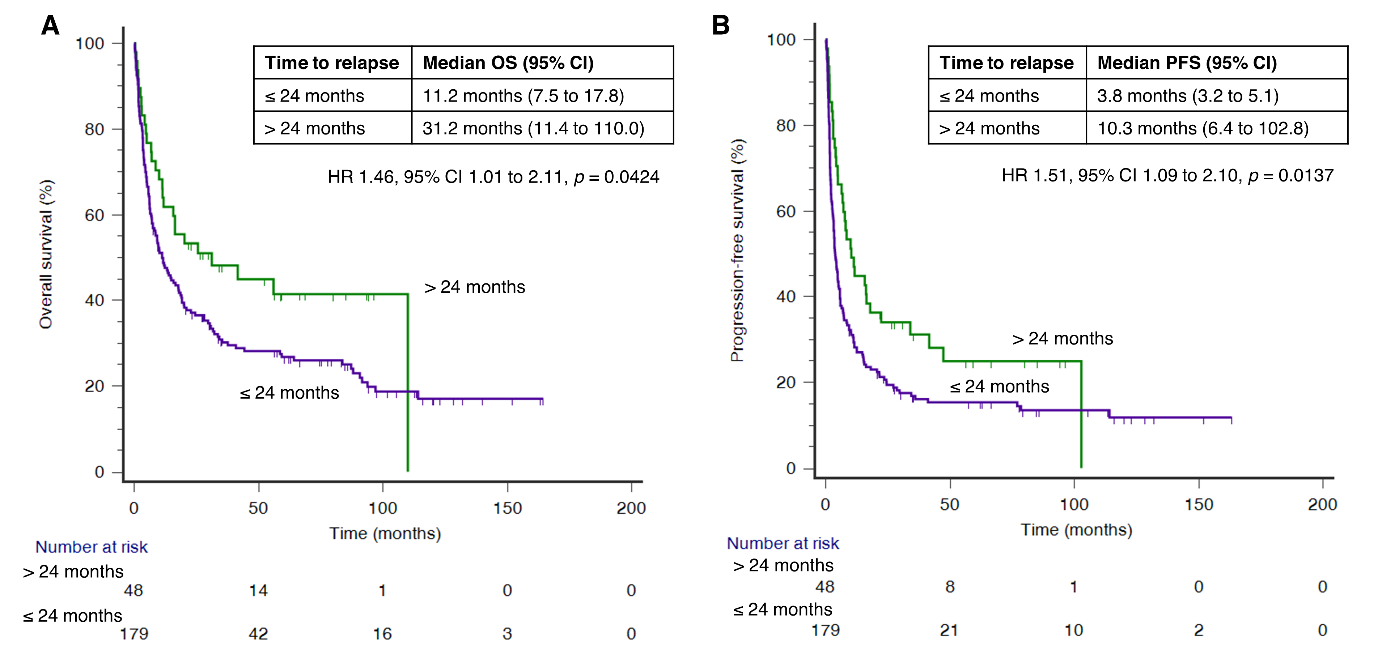
**

**Supplementary Figure 2. Time to relapse and survival outcomes.** (A-B) Earlier relapse within 24 months confers worse OS and PFS outcomes as compared with later relapses beyond 24 months.

**
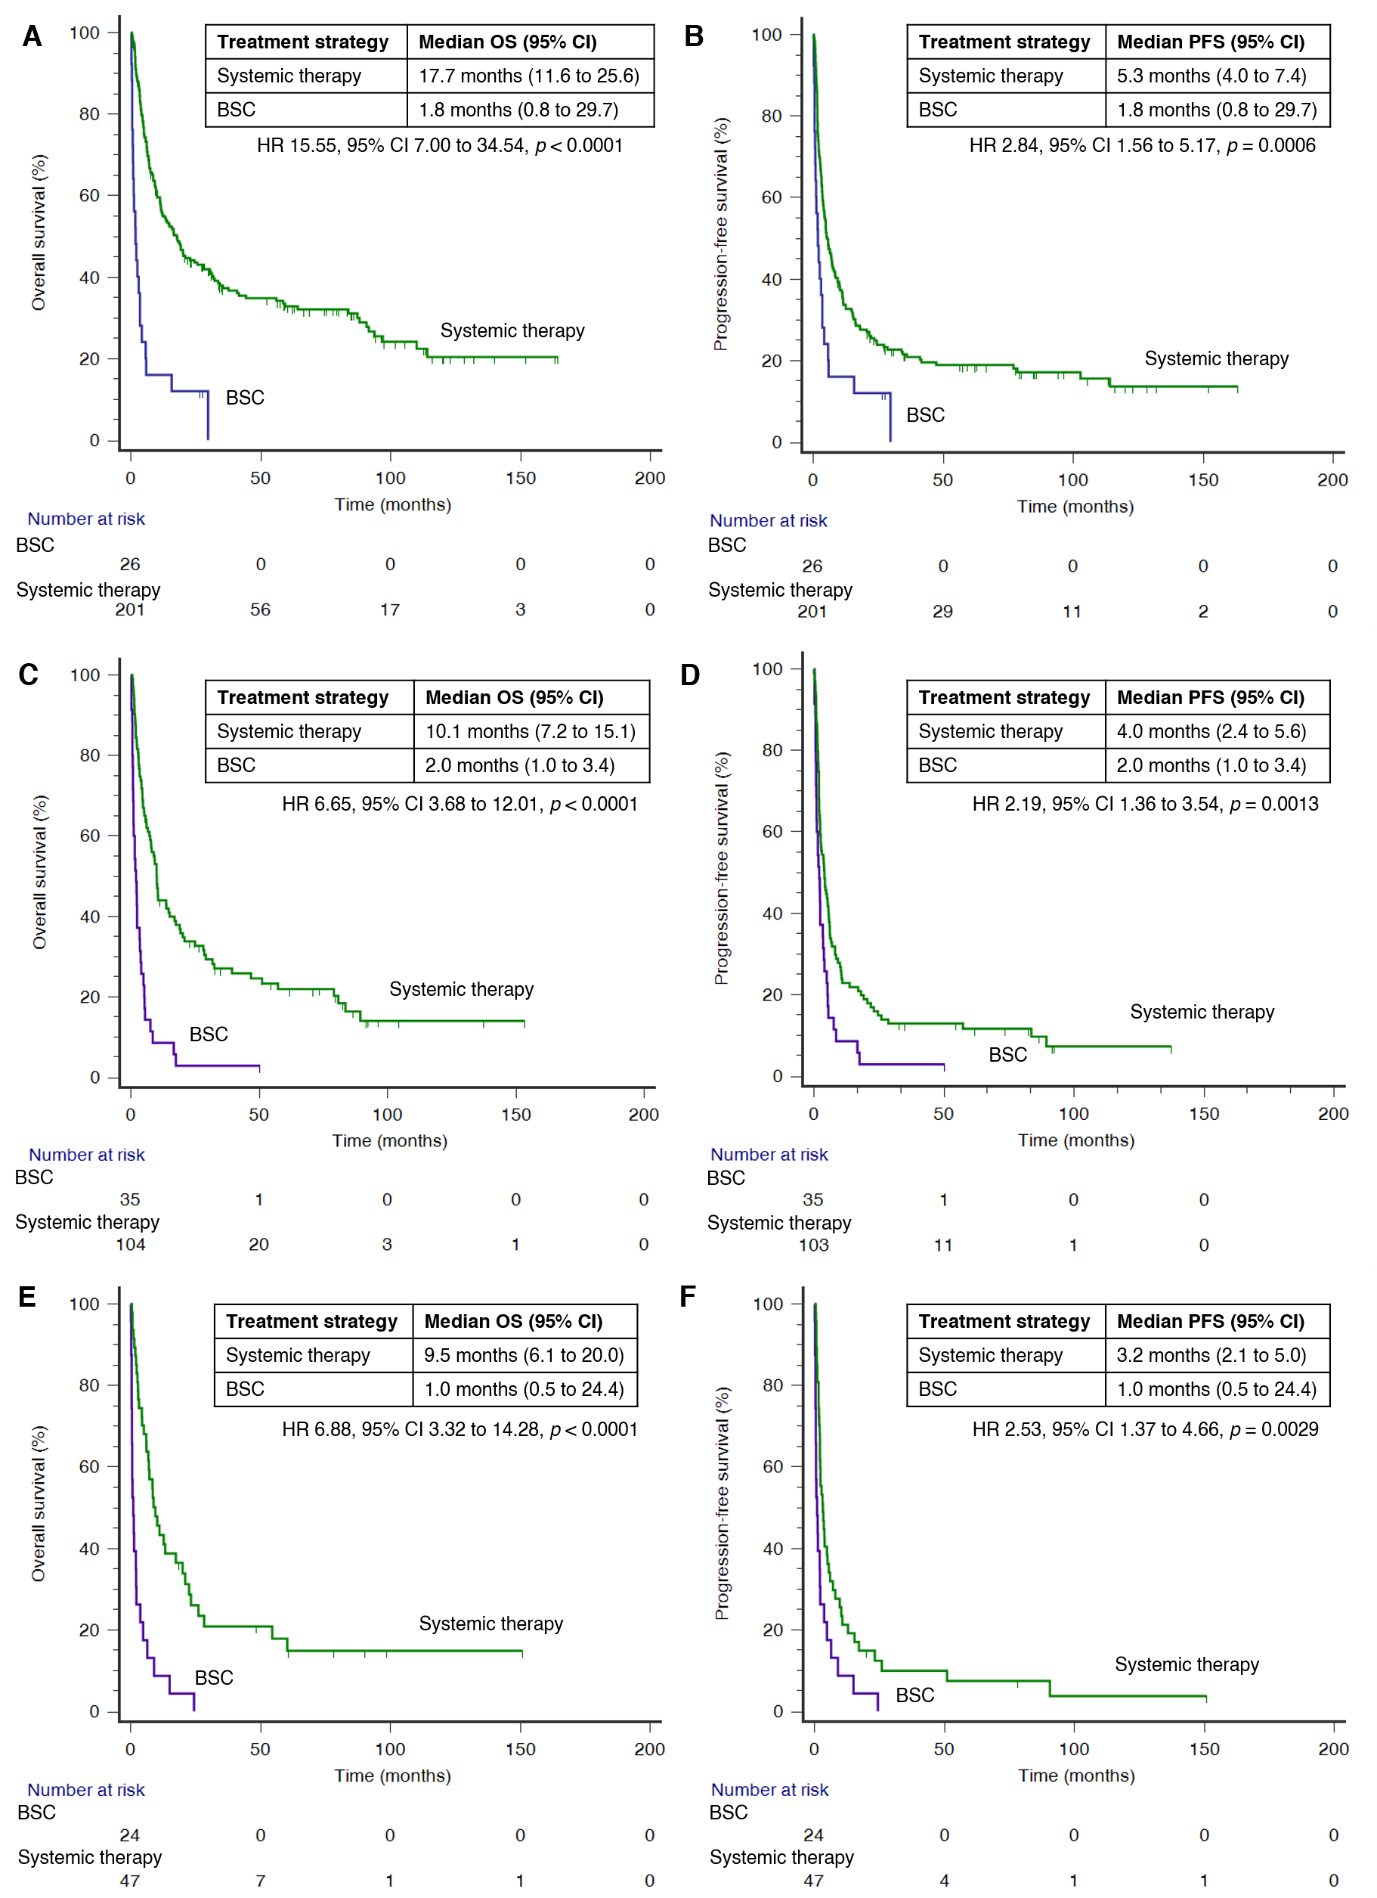
**

**Supplementary Figure 3. Kaplan-Meier plots of overall survival (OS) and progression-free survival (PFS) of relapsed/refractory (R/R) DLBCL from each relapse, stratified by treatment strategy.** (A-B) First relapse. (C-D) Second relapse. (E-F) Third relapse.

**
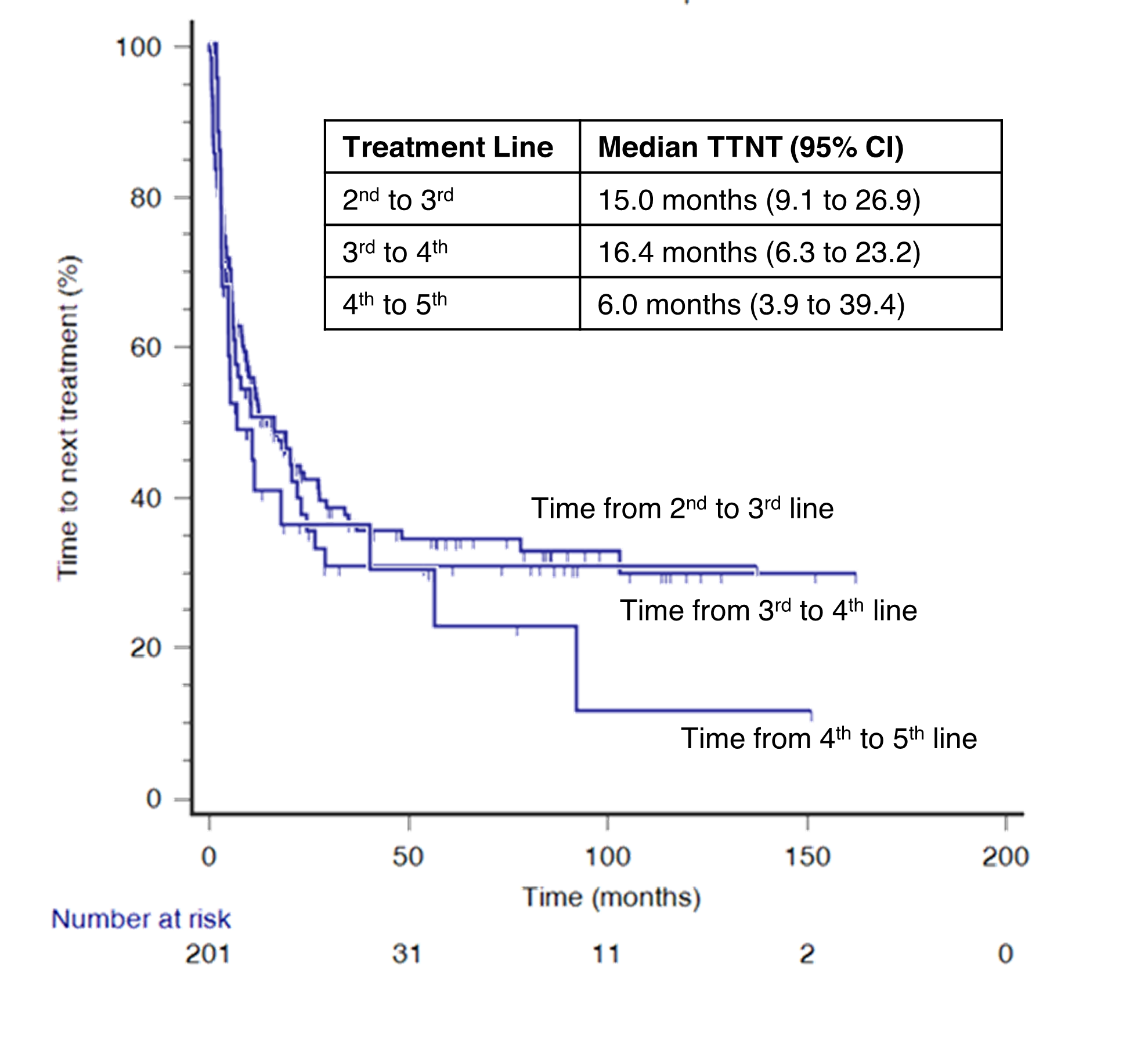
**

**Supplementary Figure 4. Time to next treatment from 2nd to 4th lines.** Median time to next treatment at 15.0 months (2nd to 3rd line), 16.4 months (3rd to 4th line), and 6.0 months (4th to 5th line).

**
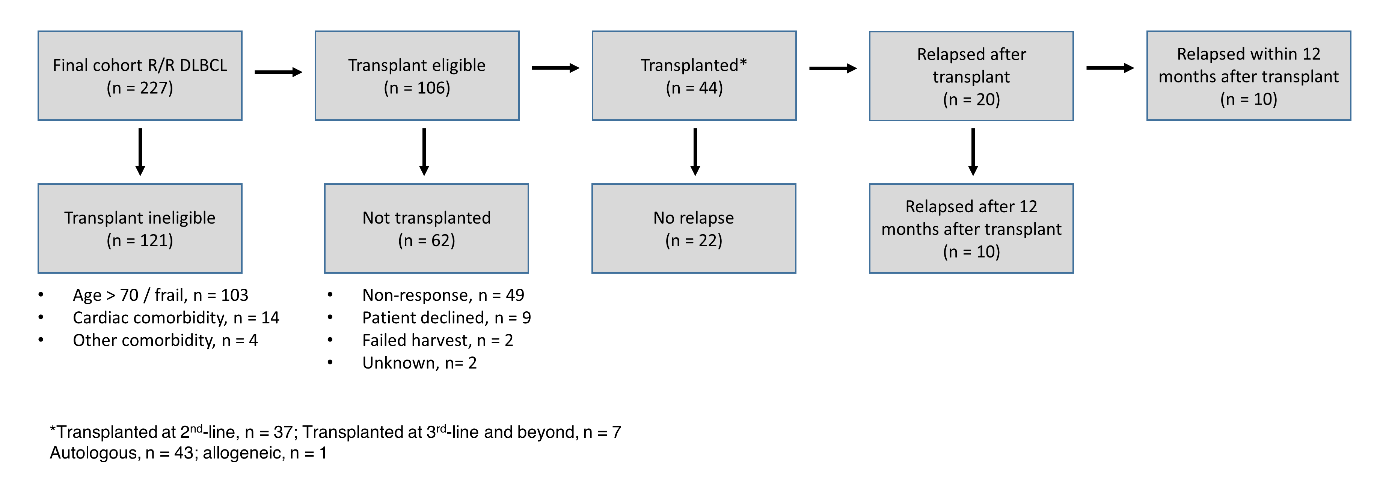
**

**Supplementary Figure 5. Overview of transplant eligibility status and relapse outcomes in the study cohort.**

**
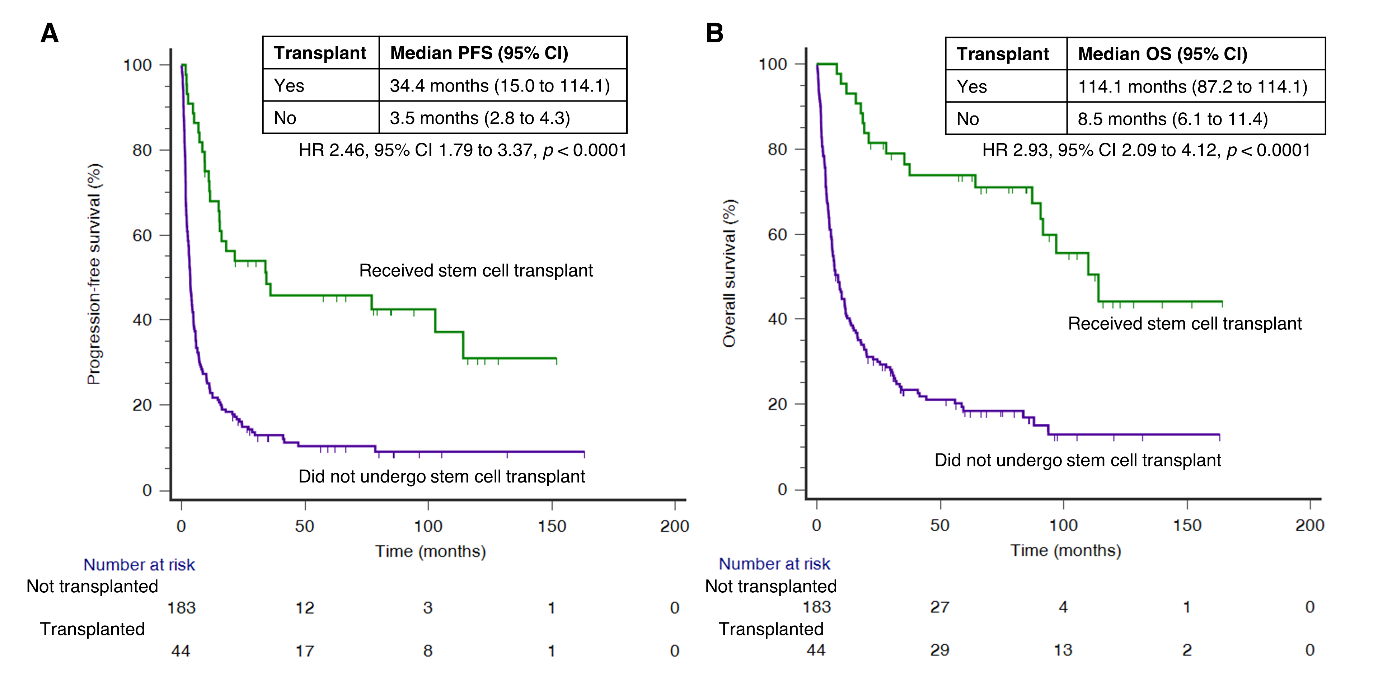
**

**Supplementary Figure 6. Survival outcomes in patients who did or did not undergo stem cell transplantation.** (A) Patients who successfully underwent stem cell transplantation had a median PFS of 34.4 months as compared to 3.5 months for those who did not. (B) Similarly, median OS was significantly higher at 114.1 months and 8.5 months, respectively.

**
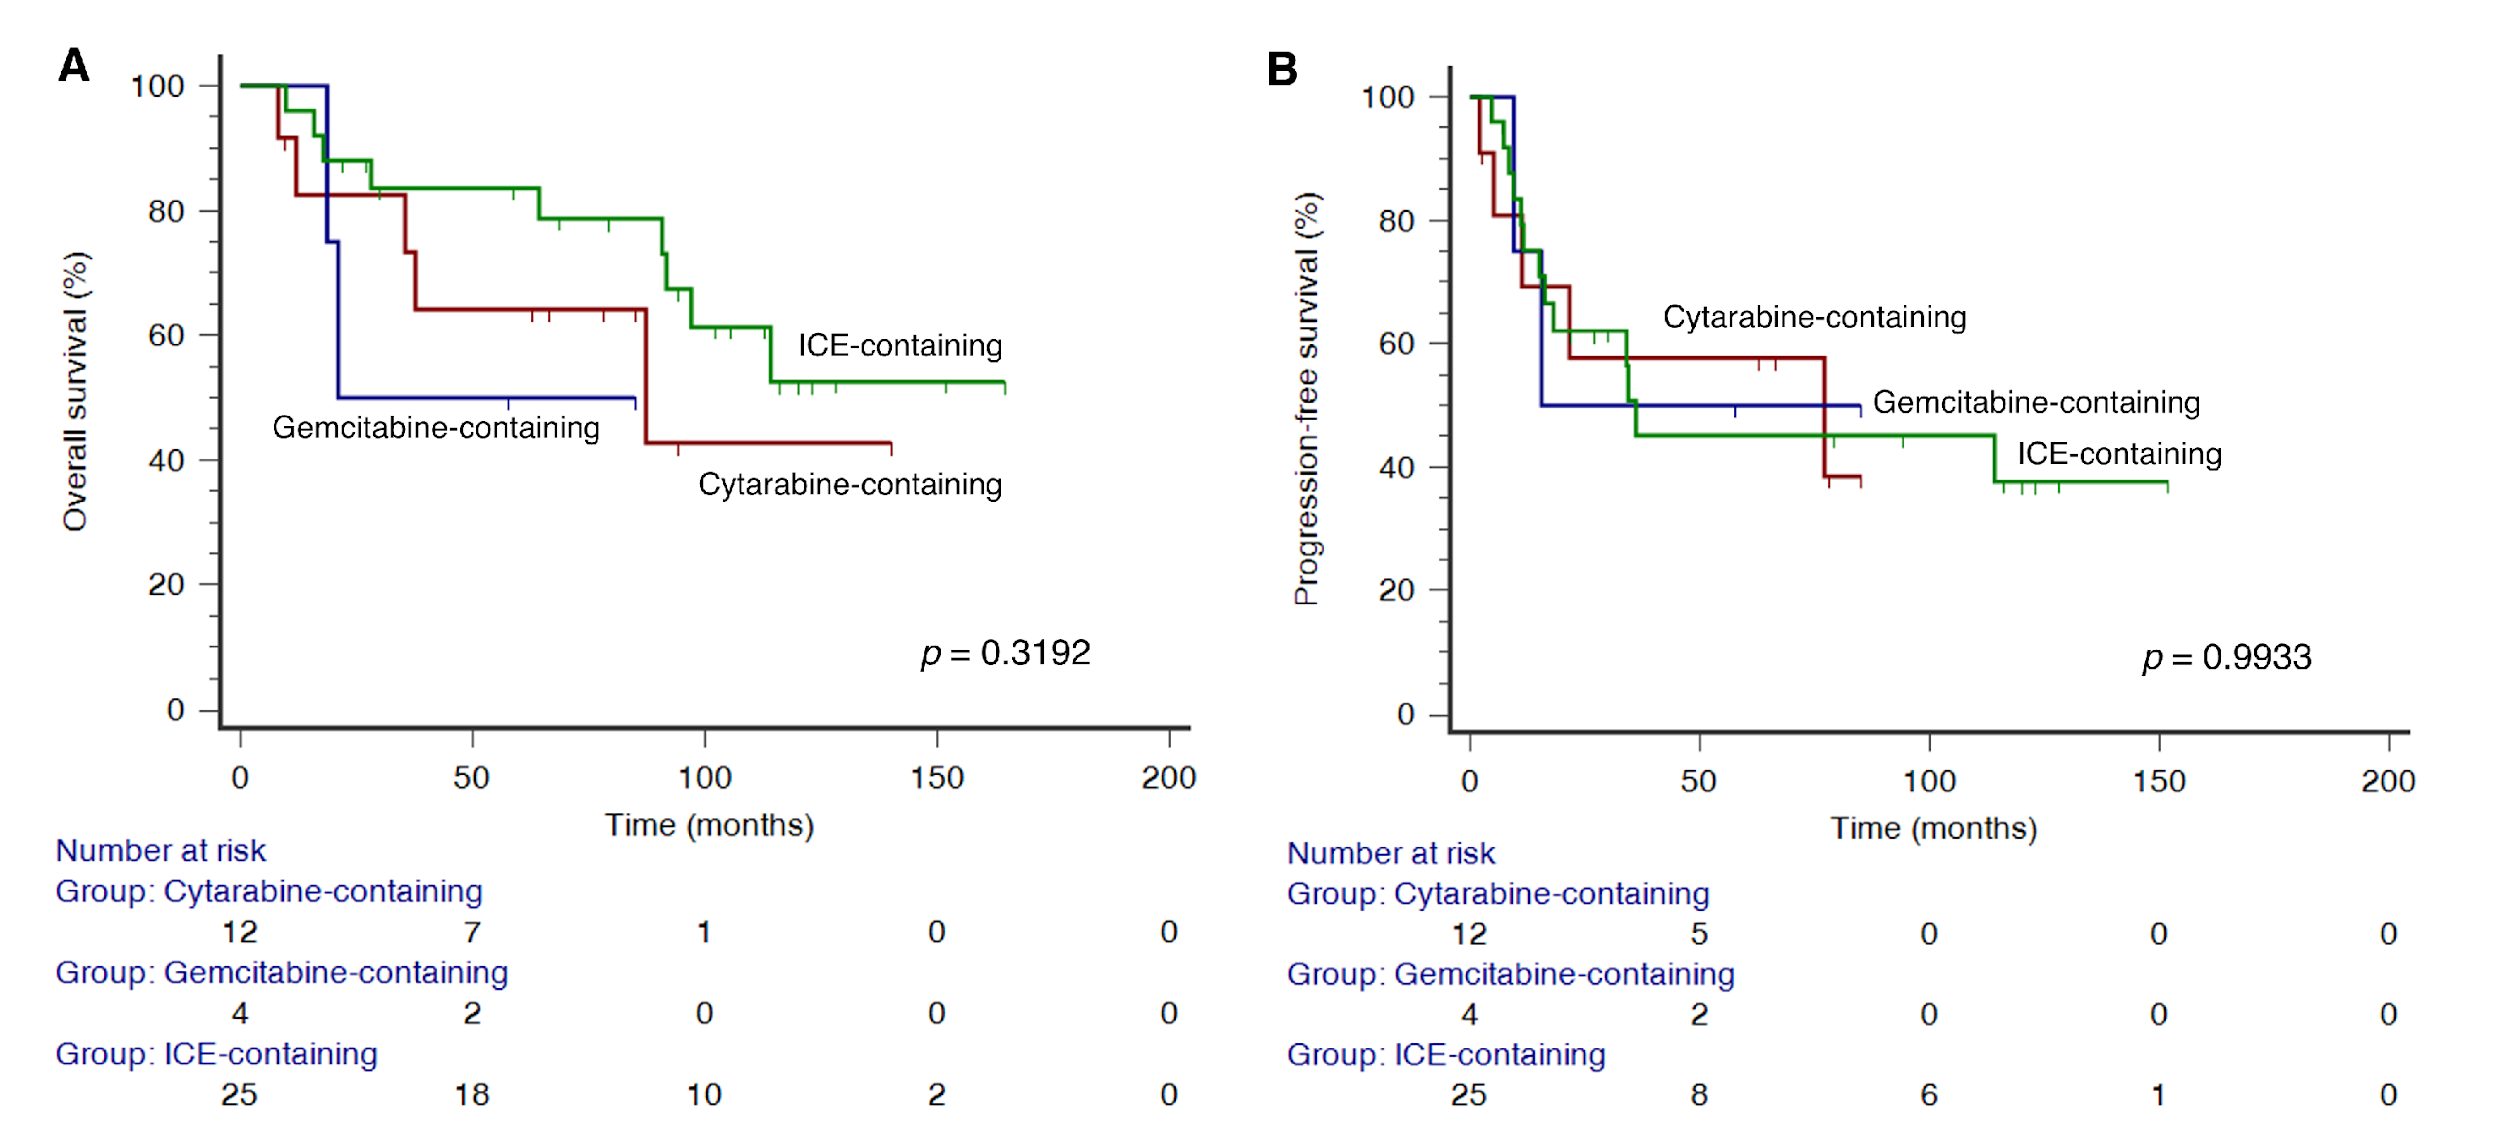
**

**Supplementary Figure 7. Salvage regimens pre-transplant and survival outcomes.** (A) Overall survival. (B) Progression-free survival.

**
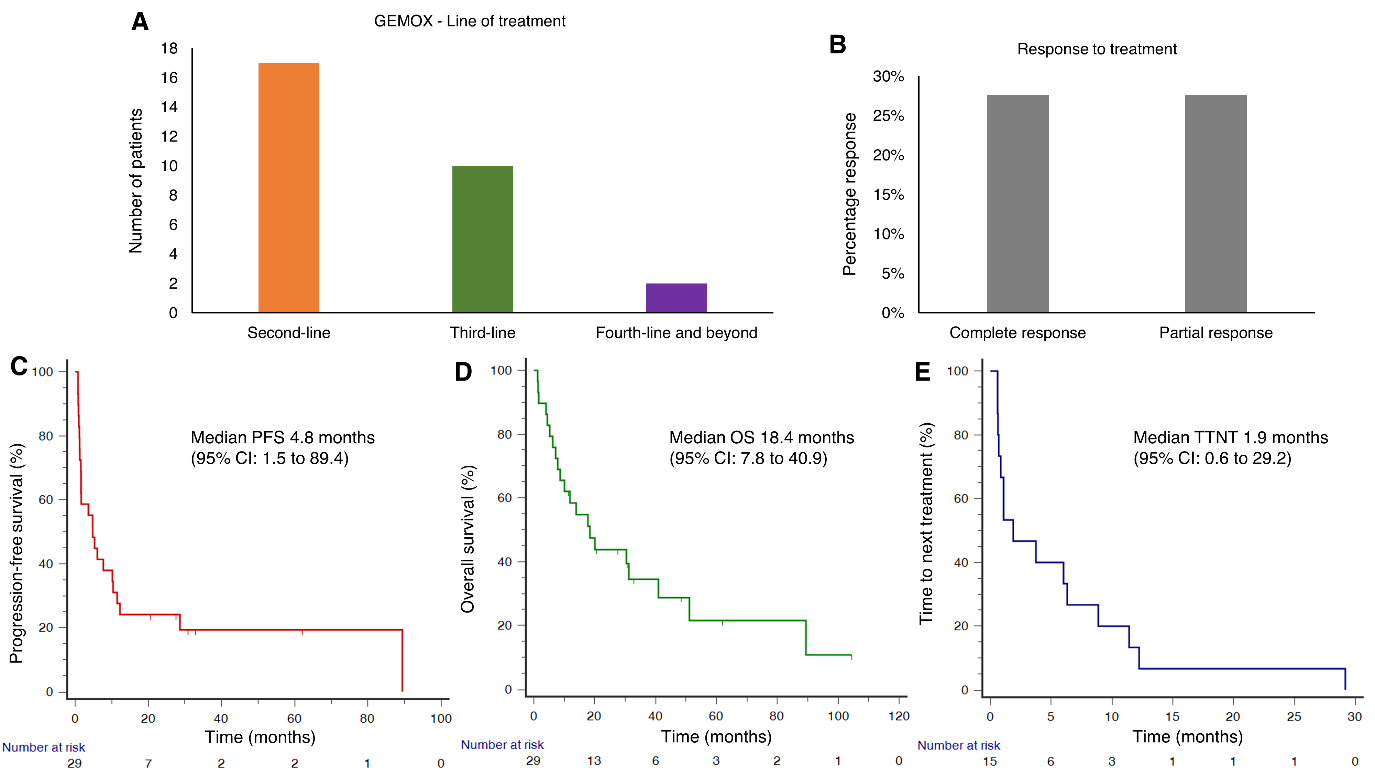
Supplementary Figure 8. Outcomes of patients treated with GEMOX regimen.** (A) Twenty-nine patients received GEMOX in the second line (n = 17), third line (n = 10), and fourth-line and beyond (n = 2). The majority received GEMOX with rituximab (R-GEMOX) (n = 27). (B) Partial response (27.6%) and complete response (27.6%) rates. (C) Median PFS was 4.8 months. (D) Median OS was 18.4 months. (E) TTNT was 1.9 months.

**
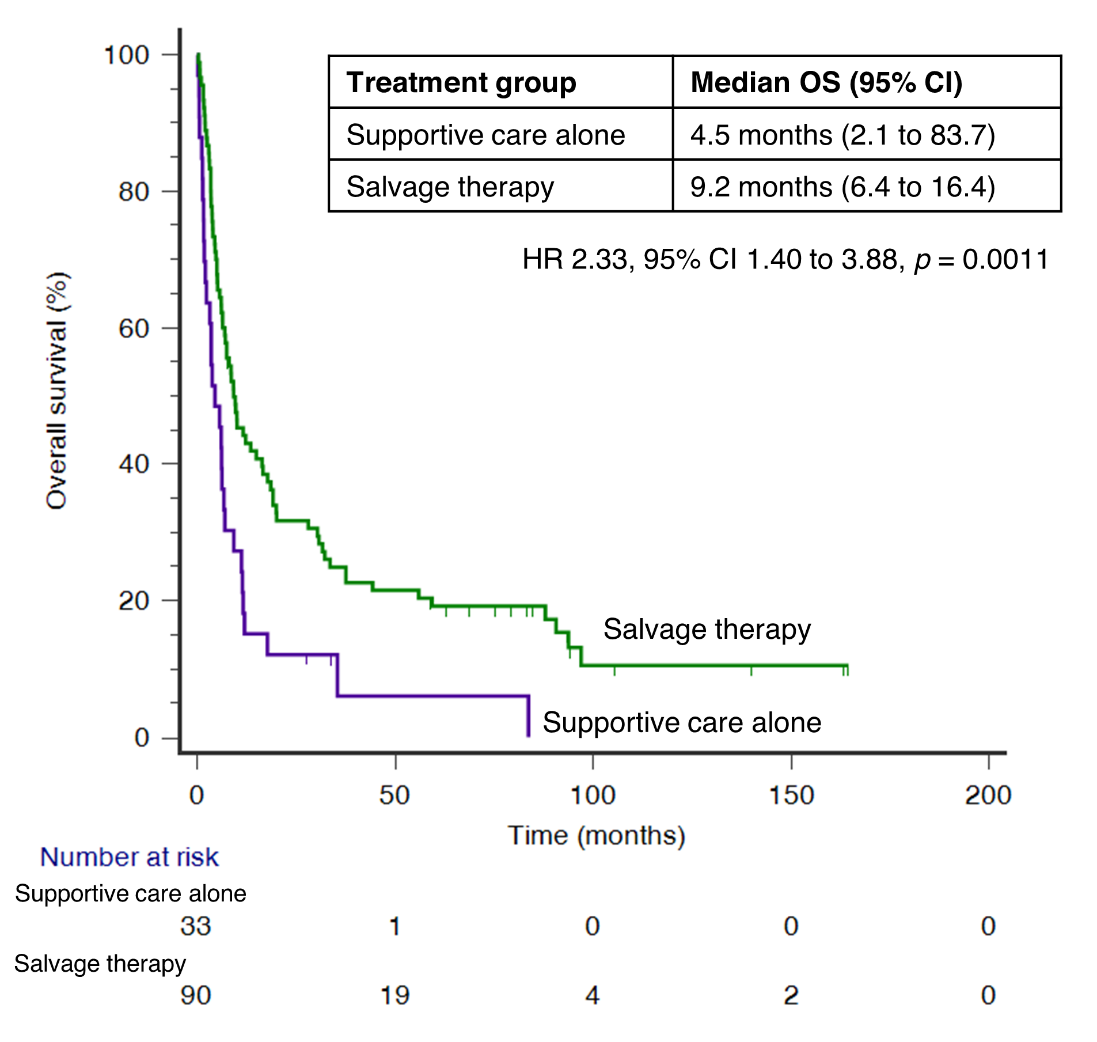
**

**Supplementary Figure 9. Outcomes of refractory DLBCL as per SCHOLAR-1 criteria, from time of initial relapse.** Shown are survival outcomes with or without initiation of salvage therapy.

**
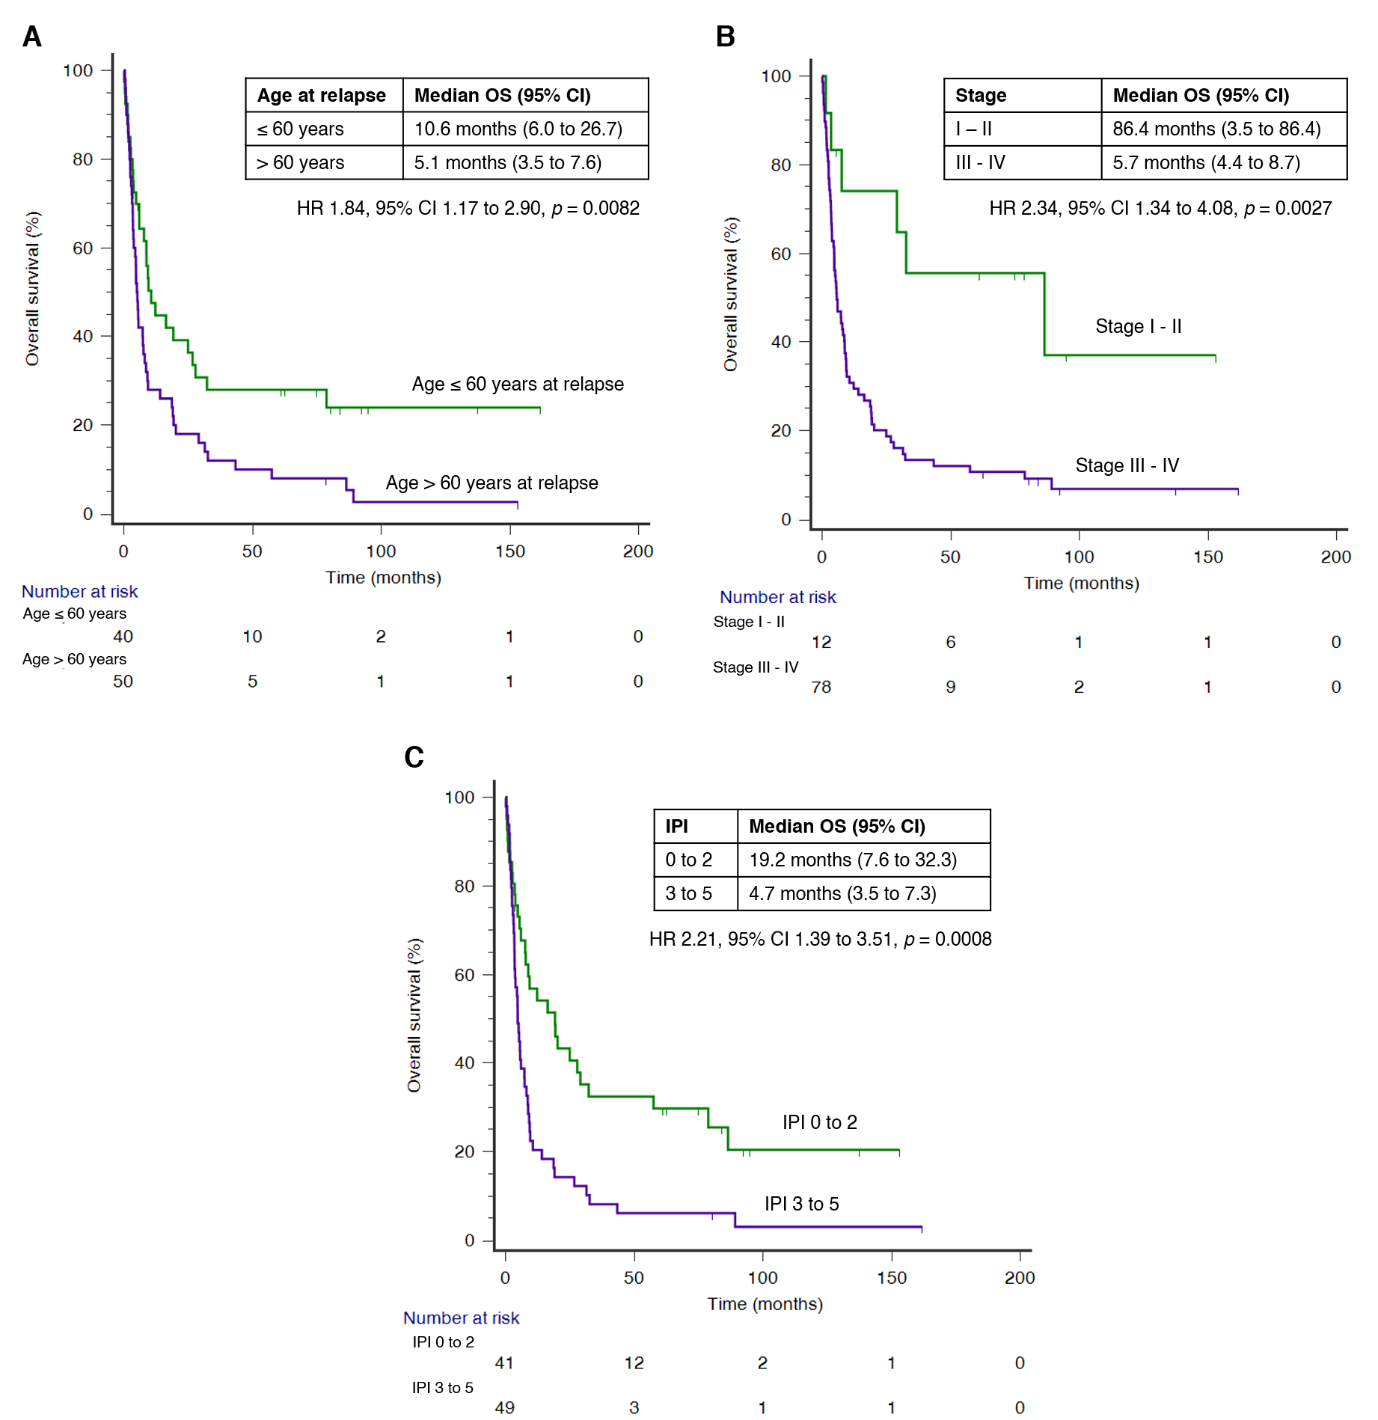
**

**Supplementary Figure 10. Outcomes of refractory DLBCL as per SCHOLAR-1 criteria, from commencement of salvage therapy.** (A) OS outcomes subgrouped by age at relapse. (B) Subgroup by stage at initial diagnosis. (C) Subgroup by IPI scores at initial diagnosis.

| **Supplementary Table 1. Clinical characteristics of patients treated with GEMOX** | |
| --- | --- |
| **Characteristic** | **n (%)** |
| **Total number of patients** | 29 (100%) |
| **Sex** |  |
| Male | 21 (72.4%) |
| Female | 8 (27.6%) |
| **Age at diagnosis (years)** |  |
| Median (range) | 71.2 (19.9 to 87.2) |
| **Age at first relapse (years)** |  |
| Median (range) | 74.0 (20.3 to 88.0) |
| **Primary refractory disease** |  |
| Yes | 9 (31.0%) |
| No | 20 (69.0%) |
| **ECOG performance status** |  |
| 0 to 1 | 28 (96.6%) |
| 2 to 4 | 1 (3.4%) |
| **Ann Arbor stage** |  |
| I-II | 10 (34.5%) |
| III-IV | 19 (65.5%) |
| **B-symptoms** |  |
| Present | 12 (41.4%) |
| Absent | 17 (58.6%) |
| **Serum LDH** |  |
| Raised (above upper limit of normal) | 20 (69.0%) |
| Not raised | 9 (31.0%) |
| **Extranodal sites** |  |
| > 1 | 7 (24.1%) |
| ≤ 1 | 22 (75.9%) |
| **IPI score** |  |
| Low (0 to 1) | 4 (13.8%) |
| Low-Intermediate (2) | 11 (37.9%) |
| High-intermediate (3) | 10 (34.5%) |
| High (4 to 5) | 4 (13.8%) |
| **Cell of origin** |  |
| Germinal center | 6 (24.0%) |
| Non-germinal center | 19 (76.0%) |
| ***MYC* rearrangement** |  |
| Present* | 0 (0.0%) |
| Absent | 11 (100.0%) |
| ***Anti-CD20 agent*** |  |
| Rituximab (R-GEMOX) | 27 (93.1%) |
| Obinutuzumab | 1 (3.4%) |
| None | 1 (3.4%) |
| ***Dosing frequency*** |  |
| Two-weekly | 19 (65.6%) |
| Three-weekly | 7 (24.1%) |
| Only single cycle administered | 3 (10.3%) |
| ***Line of therapy*** |  |
| Second-line | 17 (58.6%) |
| Third-line | 10 (34.5%) |
| Fourth-line and beyond | 2 (6.9%) |
| Missing data: Cell-of-origin, n = 4; MYC rearrangement status, n = 18 | |
|  | |
